# Supplementary material
Source: Springer Nature journal article supplement (https://www.springermedizin.de/resource/supplementary/13256_2007_393_MOESM1_ESM.pdf/9645888)

**GEL ARGENT**

**NON ABSORBE**

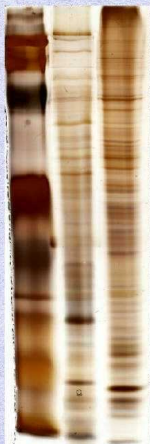

**LPNE FTUL**

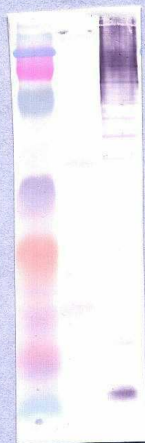

**LPNE FTUL**

Supplement: MOESM1 [file 9645888]
